# Supplementary material for: Structure of catalytically active Rh–In bimetallic phase for amination of alcohols
Source: Royal Society of Chemistry journal article supplement (doi:10.1039/c4ra03984j), 2014-01-01
Supplement: c4ra03984j1.pdf [file c4ra03984j1.pdf]

Supplementary Information for

Structure of catalytically active Rh-In bimetallic phase for amination of alcohols

Tsukasa Takanashi, Masazumi Tamura, Yoshinao Nakagawa\* and Keiichi Tomishige\*

*Department of Applied Chemistry, School of Engineering, Tohoku University,*

*6-6-07, Aoba, Aramaki, Aoba-ku, Sendai 980-8579, Japan*

\*Corresponding authors: Keiichi Tomishige and Yoshinao Nakagawa

School of Engineering, Tohoku University,

6-6-07, Aoba, Aramaki, Aoba-ku, Sendai, 980-8579, Japan

E-mail: [tomi@erec.che.tohoku.ac.jp](mailto:tomi@erec.che.tohoku.ac.jp); [yoshinao@erec.che.tohoku.ac.jp](mailto:yoshinao@erec.che.tohoku.ac.jp)

Tel&fax: +81-22-795-7214

Table S1. Summary of XPS data of Rh-In/C (Rh 20 wt%)

| In/Rh          | Binding energy / eV |        |           |        |           |        | Molar ratio from XPS |                    |
|----------------|---------------------|--------|-----------|--------|-----------|--------|----------------------|--------------------|
|                | Rh                  | Rh     | In 3d 5/2 |        | In 3d 3/2 |        | In(0)/               | In/Rh <sup>b</sup> |
|                | 3d 5/2              | 3d 3/2 | In(III)   | In(0)  | In(III)   | In(0)  | In(III)              |                    |
| 0.1            | 307.40              | 312.15 | 444.58    | -      | 452.14    | -      | 0                    | 0.19               |
| 0.2            | 307.35              | 312.10 | 444.46    | -      | 452.00    | -      | 0                    | 0.37               |
| 0.5            | 307.32              | 312.03 | 444.74    | 443.90 | 452.28    | 451.49 | 1.0                  | 0.96               |
| 1              | 306.81              | 311.44 | 444.70    | 443.78 | 452.22    | 451.33 | 1.9                  | 1.6                |
| 2 <sup>a</sup> | 306.69              | 311.31 | 444.44    | 443.66 | 452.00    | 451.22 | 1.5                  | 2.4                |

<sup>a</sup> Actual value was 1.6 (XRF). <sup>b</sup> Large uncertainty exists because of the overlap between Rh 3d bands and the tail of C 1s bond (Fig. S6).

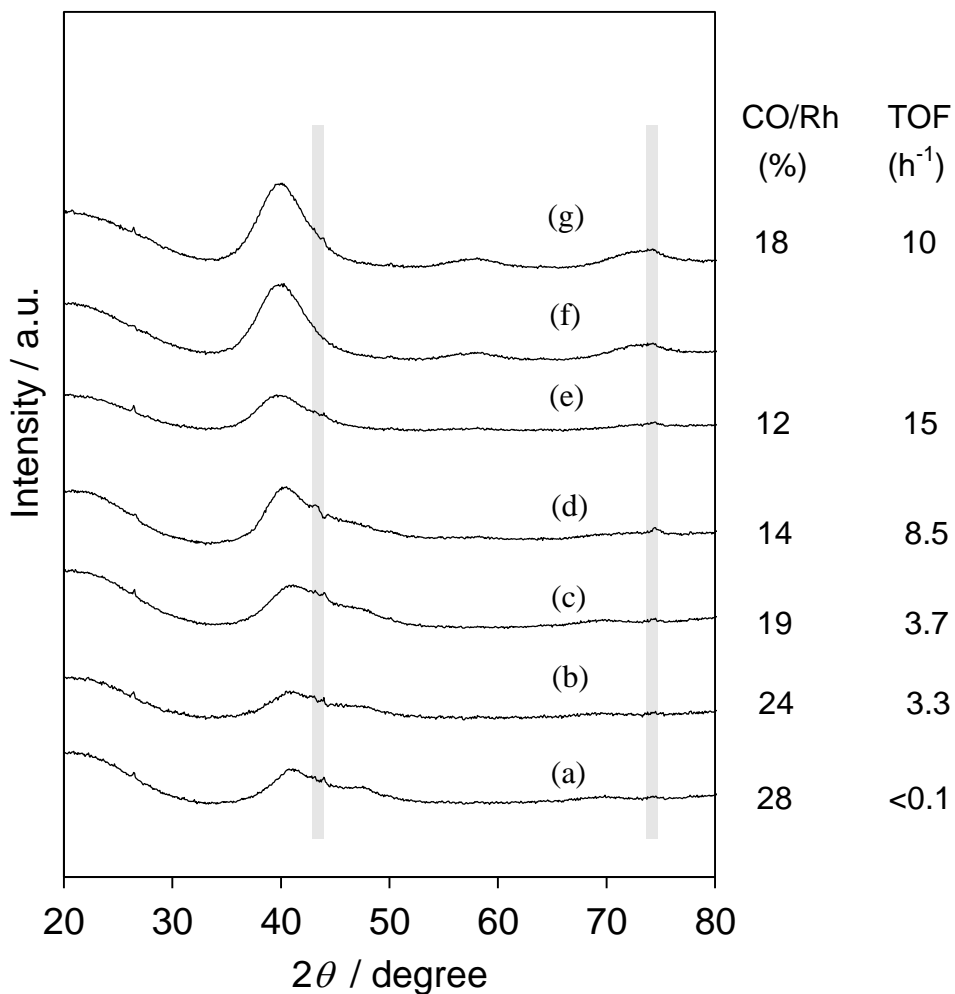

Fig. S1. XRD patterns of Rh-In/C (Rh 5 wt%) in N<sub>2</sub>. Patterns in the regions shown in gray have noise because of the overlap with the signals for XRD cell (the signals for cell were removed by subtraction). (a) Rh/C; (b) In/Rh=0.1; (c) In/Rh=0.2; (d) In/Rh=0.5; (e) In/Rh=1; (f) In/Rh=1.5; (g) In/Rh=2. CO/Rh and TOF values are the reported ones in ref. S1.

[S1] T. Takanashi, Y. Nakagawa and K. Tomishige, *Chem. Lett.*, 2014, **43**, 822-824.

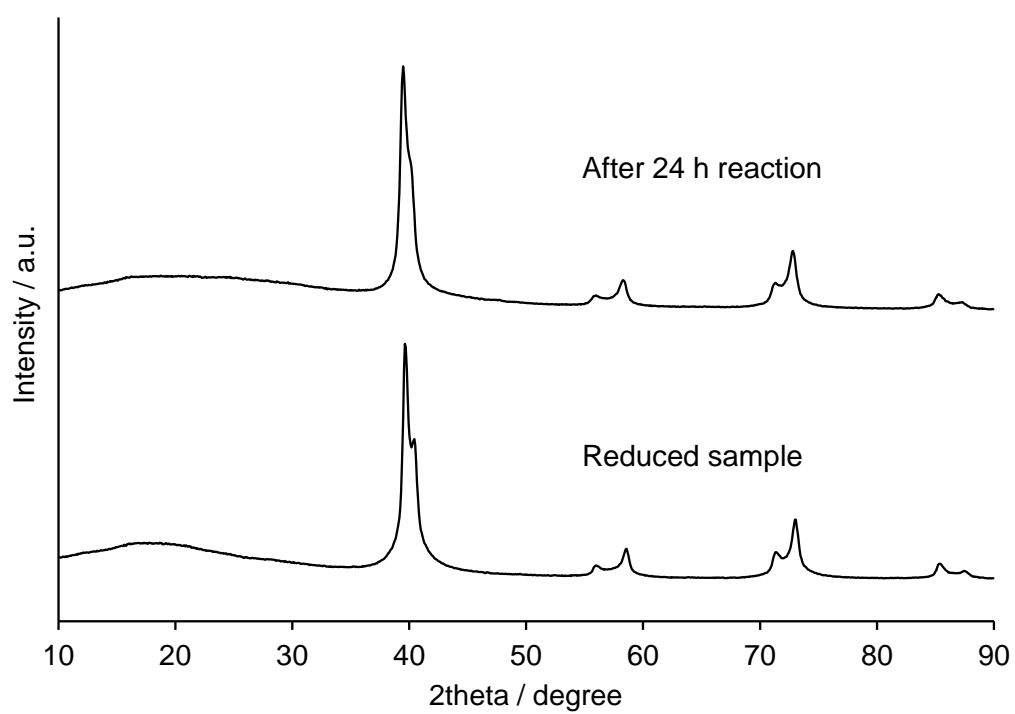

Fig. S2. XRD patterns of In-Rh/C (Rh 20 wt%, In/Rh=1) before and after catalytic use.

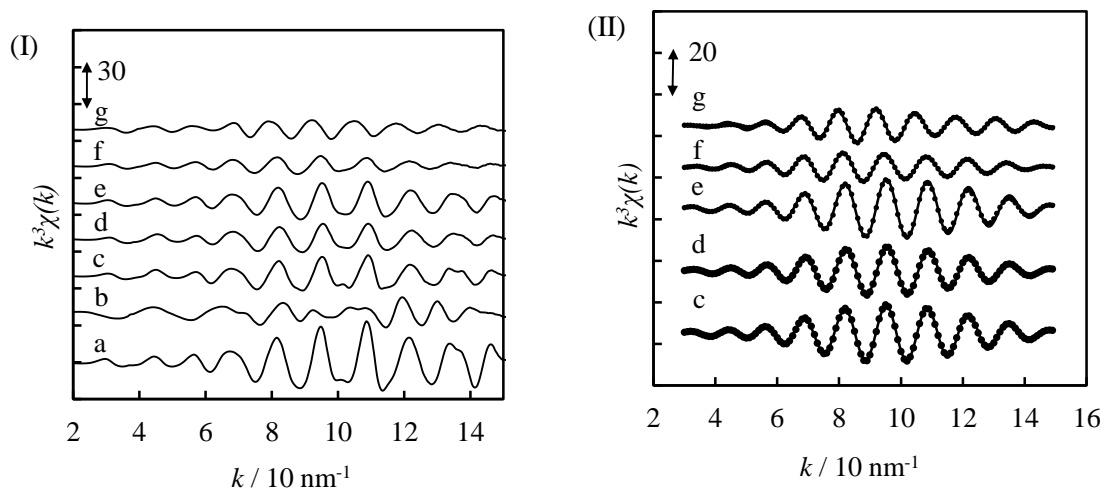

Fig. S3. Results of Rh *K*-edge EXAFS analysis of Rh-In/C (Rh 20 wt%) and reference compounds. (I)  $k^3$ -Weighted EXAFS oscillations. (II) Fourier filtered EXAFS data (solid line) and calculated data (dotted line). Fourier filtering range: 0.166-0.292 nm. (a) Rh foil, (b)  $\text{Rh}_2\text{O}_3$ , (c) Rh/C, (d-g) Rh-In/C. (d) In/Rh=0.1, (e) In/Rh=0.2, (f) In/Rh=0.5, (g) In/Rh=1.

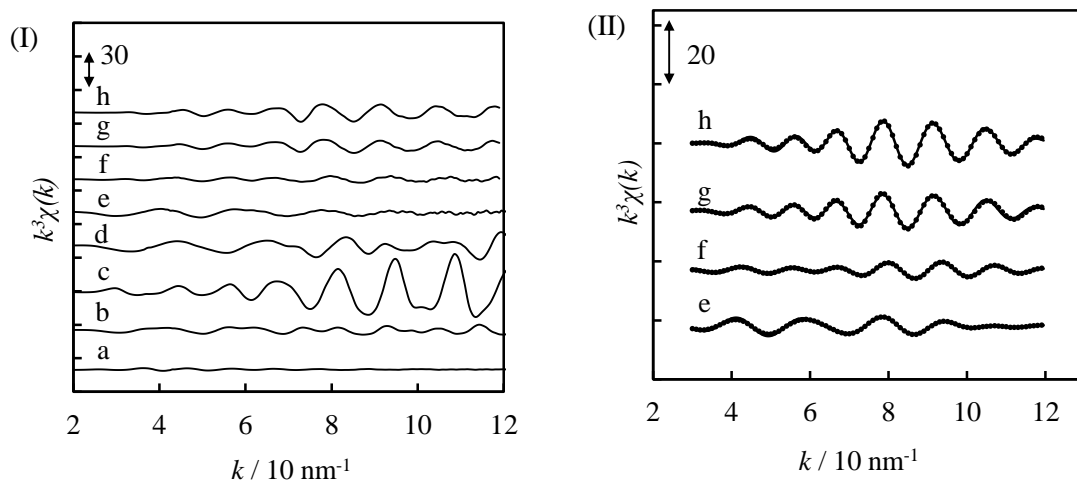

Fig. S4. Results of In *K*-edge EXAFS analysis of Rh-In/C (Rh 20 wt%) and reference compounds. (I)  $k^3$ -Weighted EXAFS oscillations. (II) Fourier filtered EXAFS data (solid line) and calculated data (dotted line). Fourier filtering range: 0.126-0.279 nm. (a) In foil, (b)  $\text{In}_2\text{O}_3$ , (c) Rh foil, (d)  $\text{Rh}_2\text{O}_3$ , (e-i) Rh-In/C. (e) In/Rh=0.1, (f) In/Rh=0.2, (g) In/Rh=0.5, (h) In/Rh=1.

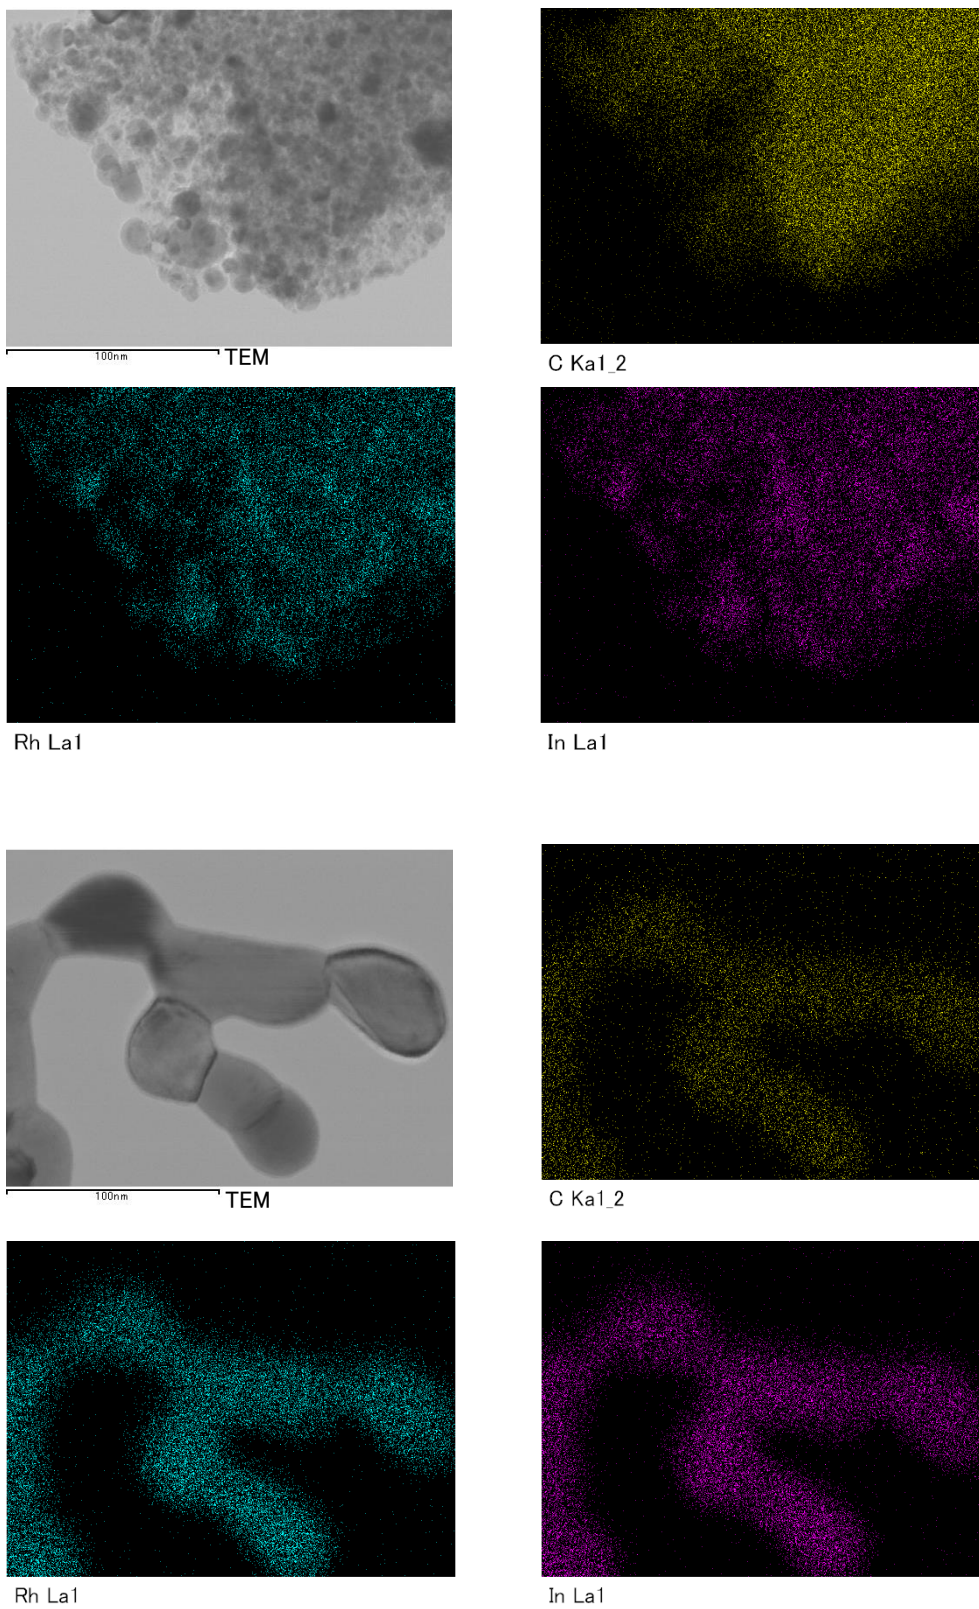

Fig. S5. TEM-EDX elemental mapping of Rh-In/C (20 wt% Rh, In/Rh=1).

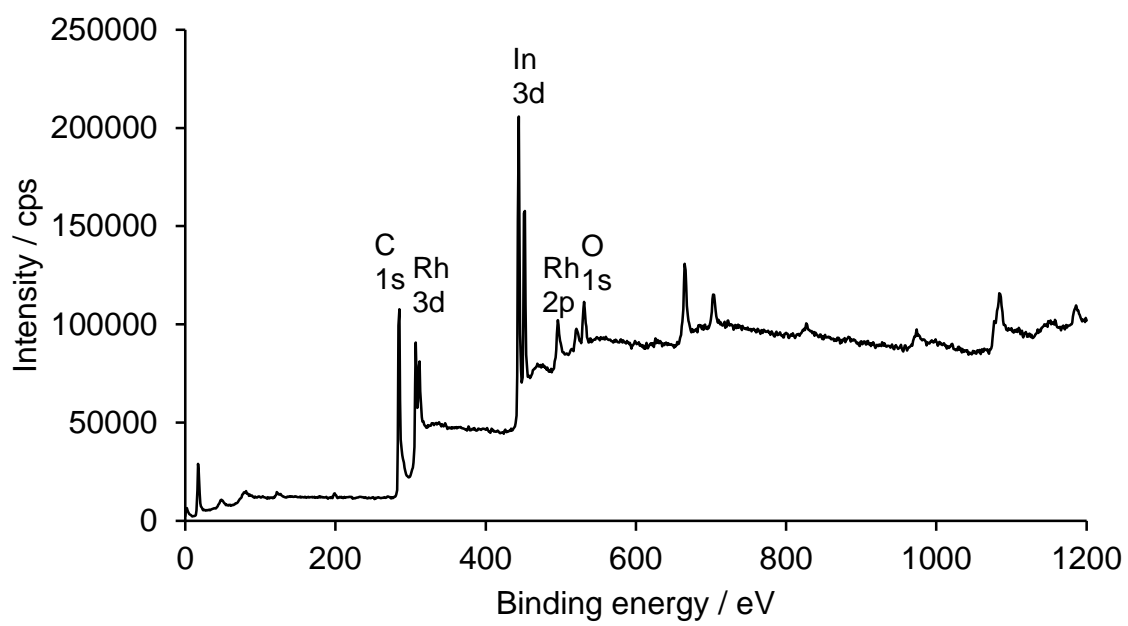

Fig. S6. Wide-scan XPS data of Rh-In/C (20 wt% Rh, In/Rh=1).



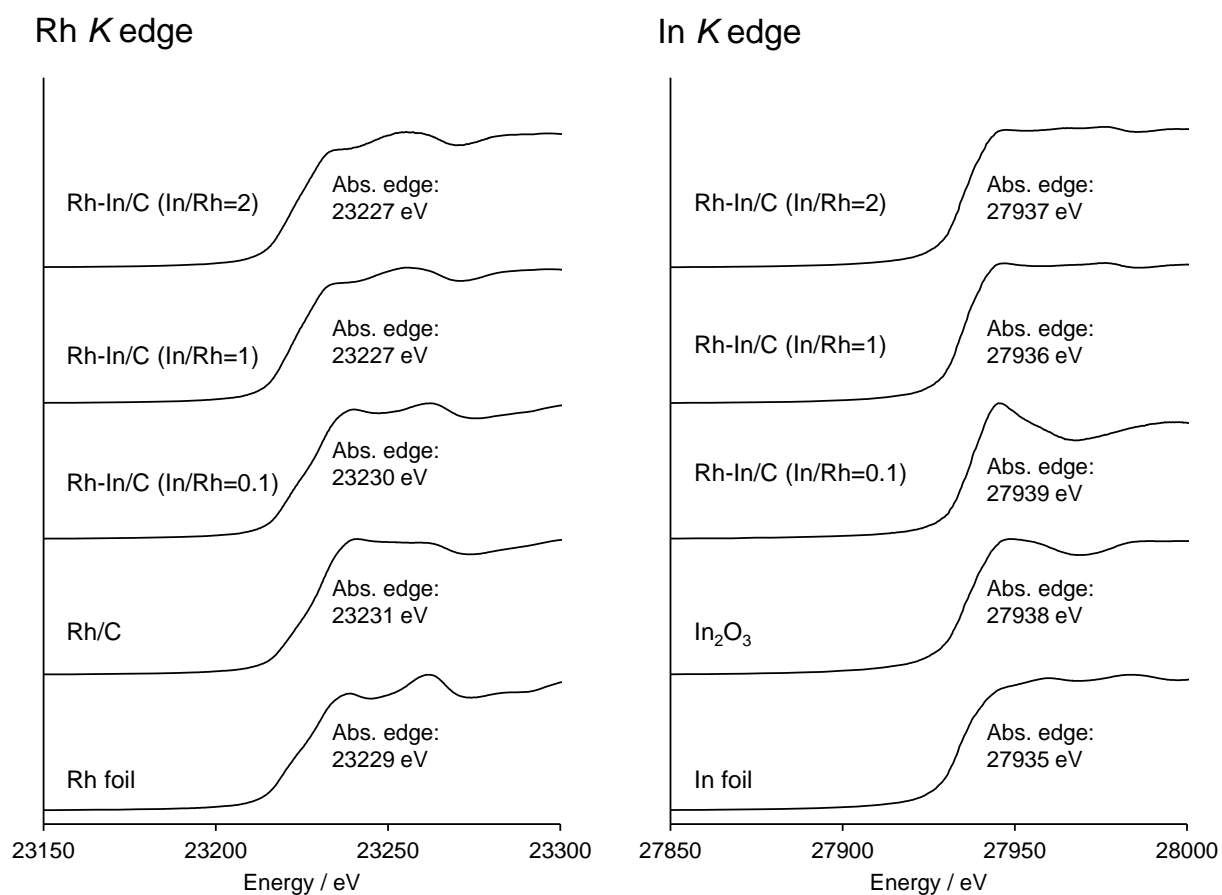

Fig. S7. XANES spectra of Rh-In/C (20 wt% Rh) and reference compounds. The y-axis was normalized. The absolute edge is the position with the largest slope. All the data were taken successively in one machine time (total <4 h).
